# Supplementary material for: The Second International Consensus Guidelines on the Management of BK Polyomavirus in Kidney Transplantation
Source: PubMed Central journal article supplement — Transplantation. 2024 Apr 12;108(9):1834–66. doi: 10.1097/TP.0000000000004976 (PMC11335089; doi:10.1097/tp.0000000000004976), 2024-04-12
Supplement: tpa-108-1834-s001.pdf [file tpa-108-1834-s001.pdf]

**Supplement Table S1: TERMINOLOGY AND DEFINITIONS**

| Term                                 | Definition                                                                                                                                                                                                                                                                                                                                                                                                                                                                                                                                                                                                                                                                                                                                                            |
|--------------------------------------|-----------------------------------------------------------------------------------------------------------------------------------------------------------------------------------------------------------------------------------------------------------------------------------------------------------------------------------------------------------------------------------------------------------------------------------------------------------------------------------------------------------------------------------------------------------------------------------------------------------------------------------------------------------------------------------------------------------------------------------------------------------------------|
| BKPyV infection                      | <p>Specific serological/immunological or virological or molecular evidence of BKPyV exposure after which replication-competent BKPyV genomes are thought to persist life-long (clinically latent infection <i>and/or</i> virologically latent infection)</p> <p>Comment: Current diagnostic techniques <i>cannot</i> rule out on-going low-level or transient replication (clinically latent) <i>versus</i> true virologically latent infection i.e., transcriptionally silent episomal BKPyV genomes inside replication-competent host cell nuclei</p>                                                                                                                                                                                                               |
| BKPyV replication                    | <p>Evidence for ongoing BKPyV multiplication</p> <ul style="list-style-type: none"> <li>- Infectious units by cell culture; PyV particles by electron microscopy; PyV structural virion proteins Vp1, Vp2/3 by immunohistochemistry;</li> <li>- messenger RNA expression / transcripts of PyV late genes (e.g. <i>VP1</i>, <i>VP2/3</i>);</li> <li>- increasing PyV DNA loads per reference unit; PyV DNA in non-latency sites (e.g., in plasma); cytological (e.g. decoy cells) or histological evidence of PyV replication</li> </ul> <p>Comment: specific markers or adjunct techniques necessary to identify BKPyV as compared to other PyVs together with evidence of viral DNA replication within host cell nuclei (e.g., specific intranuclear inclusions)</p> |
| BKPyV pathology                      | <p>Any histopathological or ultrastructural evidence of PyV-attributable tissue involvement including viral replicative, inflammatory, degenerative, or neoplastic changes</p> <ul style="list-style-type: none"> <li>- Requires specific markers or adjunct techniques to identify damage and the specific presence/role of BKPyV</li> </ul>                                                                                                                                                                                                                                                                                                                                                                                                                         |
| BKPyV-DNAuria                        | BKPyV genome detectable in native urine (by nucleic acid testing [NAT <sup>1</sup> ])                                                                                                                                                                                                                                                                                                                                                                                                                                                                                                                                                                                                                                                                                 |
| BKPyV viruria                        | BKPyV virions detectable in urine (by electron microscopy <sup>2</sup> , cytology such as “decoy cells” <sup>2,3</sup> , virus isolation by cell culture, by NAT incl. protected genomes in urine after DNase digestion)                                                                                                                                                                                                                                                                                                                                                                                                                                                                                                                                              |
| Urine BKPyV load                     | BKPyV-DNA load per urine volume by quantitative NAT (QNAT) <sup>1</sup> in copies/mL or IU/mL                                                                                                                                                                                                                                                                                                                                                                                                                                                                                                                                                                                                                                                                         |
| BKPyV-DNAemia                        | BKPyV-DNA genome detectable in blood by quantitative NAT (QNAT) <sup>1</sup> (preferentially in plasma e.g., EDTA- or Citrate-anticoagulated; whole blood and serum also possible but less/no data on comparison with plasma and/or on respective clinical validation)                                                                                                                                                                                                                                                                                                                                                                                                                                                                                                |
| BKPyV viremia                        | BKPyV virions or infectious units detectable in blood (by electron microscopy, by cell culture, protected after DNase digestion)                                                                                                                                                                                                                                                                                                                                                                                                                                                                                                                                                                                                                                      |
| BKPyV-DNA load                       | BKPyV-DNA quantified by quantitative NAT (QNAT) <sup>1</sup>                                                                                                                                                                                                                                                                                                                                                                                                                                                                                                                                                                                                                                                                                                          |
| Whole-blood BKPyV load               | BKPyV-DNA load per mL of EDTA- or Citrate-anticoagulated whole blood (less/no data on comparison with plasma and/or on clinical validation)                                                                                                                                                                                                                                                                                                                                                                                                                                                                                                                                                                                                                           |
| Tissue BKPyV load                    | BKPyV-DNA load per normalized DNA reference (e.g., diploid gene QNAT <sup>1</sup> , ug, or cell count)                                                                                                                                                                                                                                                                                                                                                                                                                                                                                                                                                                                                                                                                |
| <i>Biopsy-proven</i> PyV nephropathy | Detection of compatible cytopathic effect <i>plus</i> immunohistochemistry using the cross-reacting monoclonal antibody (PAb416) that was made against SV40 large T-antigen <sup>4</sup> or using other e.g., PyV Vp1-specific antibodies <sup>5</sup> or other techniques to identify intranuclear PyV particles and/or PyV genomes (e.g., electron microscopy, <i>in situ</i> hybridization) <sup>2</sup>                                                                                                                                                                                                                                                                                                                                                           |

|                                            |                                                                                                                                                                                                                                                                                         |
|--------------------------------------------|-----------------------------------------------------------------------------------------------------------------------------------------------------------------------------------------------------------------------------------------------------------------------------------------|
| <i>Biopsy-proven</i><br>BKPyV-nephropathy  | Proven polyomavirus nephropathy <i>plus</i> marker specific for BKPyV (immunohistochemistry, <i>in situ</i> hybridization, tissue normalized QNAT, detection of BKPyV-DNAemia in time-matched plasma) <sup>5</sup>                                                                      |
| <i>Presumptive</i> BKPyV-nephropathy       | BKPyV-DNAemia >10,000 copies/mL plasma (or equivalent) <sup>6</sup>                                                                                                                                                                                                                     |
| <i>Probable</i> BKPyV-nephropathy          | BKPyV-DNAemia >1,000 - <10,000 copies/mL plasma persisting for longer than 2 weeks <sup>6</sup>                                                                                                                                                                                         |
| <i>Possible</i> BKPyV-nephropathy          | BKPyV-DNAemia > 10 million copies/mL urine and undetectable BKPyV-DNAemia <sup>6</sup>                                                                                                                                                                                                  |
| <i>Resolving</i> BKPyV nephropathy         | Disappearance of histological evidence of PyV-replication (PyV-attributable tissue involvement) in patients with BKPyV-DNAemia loads declining >10-fold (>1 log <sub>10</sub> copies/mL (or <i>equivalent</i> ))                                                                        |
| <i>Transient</i> BKPyV-DNAemia             | Clearance of sustained BKPyV-DNAemia without specific intervention such as changing or reducing immunosuppression                                                                                                                                                                       |
| <i>Blip</i> BKPyV-DNAemia                  | Single detection (positive) of BKPyV-DNA by QNAT <sup>1</sup> in plasma preceded and followed by undetectable (negative) BKPyV-DNA by QNAT during patient screening and monitoring using the same assay in the same laboratory (analogous to definitions in HIV medicine <sup>7</sup> ) |
| <i>Biopsy-proven</i><br>JCPyV- nephropathy | Detection of PyV nephropathy plus marker specific for JCPyV <sup>8</sup> and demonstration that BKPyV is not detectable                                                                                                                                                                 |

<sup>1</sup> Detection of viral genome, mostly by nucleic acid testing (NAT) techniques such PCR or other techniques such as ligase or signal amplification

<sup>2</sup> May require specific markers and/or adjunct techniques to prove specific involvement of BKPyV

<sup>3</sup> Enlarged nuclei, intranuclear inclusion, in renal tubular epithelial cells and/or transitional cells

<sup>4</sup> Immunohistochemistry using PAb416 raised is not specific BKPyV, but recognizes also JC polyomavirus (JCPyV) in JCPyVAN; support in clinical routine through plasma BKPyV-DNAemia by QNAT

<sup>5</sup> BKPyV-specific immunohistochemistry using non-cross-reactive antibodies e.g., anti-Vp1

<sup>6</sup> S-creatinine elevation from baseline is NOT needed since focal PyV-nephropathy stages occur without crude functional impairment and impaired kidney allograft function may be due to other etiologies (e.g., rejection, immune reconstitution)

<sup>7</sup> <https://clinicalinfo.hiv.gov/sites/default/files/guidelines/documents/adult-adolescent-arv/virologic-failure-adult-adolescent-arv.pdf>

<sup>8</sup> JCPyV-DNA load is often low/undetectable in plasma, despite high-level urine JCPyV-loads of >10 million copies/mL and requires detection by JCPyV-specific assays such as *in situ* hybridization, immunohistochemistry or tissue JCPyV-DNA load and undetectable BKPyV

**Supplement Table S2: LABORATORY METHODS - VIROLOGY**

| <b>Virological Assays</b> | <b>Target (Method)</b>                                      | <b>Matrix, compartment</b>                                                                                                   | <b>Advantages</b>                                                                                                                                                                                                                          | <b>Limitations</b>                                                                                                                                                                                                                                                                                           | <b>Additional comments</b>                                                                                                                                                                                                                                                                                                                                                                                              | <b>References</b> |
|---------------------------|-------------------------------------------------------------|------------------------------------------------------------------------------------------------------------------------------|--------------------------------------------------------------------------------------------------------------------------------------------------------------------------------------------------------------------------------------------|--------------------------------------------------------------------------------------------------------------------------------------------------------------------------------------------------------------------------------------------------------------------------------------------------------------|-------------------------------------------------------------------------------------------------------------------------------------------------------------------------------------------------------------------------------------------------------------------------------------------------------------------------------------------------------------------------------------------------------------------------|-------------------|
| BKPyV-DNA load            | viral DNA (QNAT)                                            | -Plasma, urine<br>-Plasma is preferred (see recommendations)<br>-Whole blood gives higher variability and should not be used | -High sensitivity/<br>specificity<br>-High NPV/PPV<br>-BKPyV-DNAemia loads define clinical definitions<br>-Probable BKPyV-nephropathy >3 log <sub>10</sub> c/mL for >2 weeks,<br>- Presumptive BKPyV-nephropathy >4 log <sub>10</sub> c/mL | - BKPyV-DNAemia loads in plasma correspond largely to non-encapsidated genome fragments being sensitive to degradation<br>- keep processing times short<br>- readily separate plasma from rest of blood<br>- keep cool until extraction<br>avoid prolonged shipment<br>- avoid multiple freezing and thawing | -Standard of care<br>-Most frequent QNAT targets ( <i>sTag/LTag</i> , <i>VP1</i> , <i>VP2</i> , <i>VP3</i> )<br>- avoid highly variable non-coding control region<br>-Similar efficacy but higher reproducibility with automated vs manual DNA extraction methods<br>-If only urine is tested and urine BKPyV-DNA loads are >7 log <sub>10</sub> c/mL, consider to switch to plasma BKPyV-DNA loads                     | 1-7               |
|                           | viral DNA (ddNAT)                                           | -Urine                                                                                                                       | -High sensitivity/<br>specificity<br>-High reproducibility<br>-Absolute quantification                                                                                                                                                     | -Requires equipment not routinely available in diagnostic laboratories                                                                                                                                                                                                                                       | -Needs adaption for plasma samples                                                                                                                                                                                                                                                                                                                                                                                      | 8                 |
|                           | viral DNA (PI-dNAT)                                         | -Urine                                                                                                                       | -No DNA extraction needed<br>-Short analysis time of 2 hours                                                                                                                                                                               | -Requires equipment not routinely available in most diagnostic laboratories                                                                                                                                                                                                                                  | -Potentially useful for point-of-care setting<br>-Needs adaption for plasma samples                                                                                                                                                                                                                                                                                                                                     | 9                 |
| Cytology                  | decoy cells (urine cytology; cytospin)                      | -Urine                                                                                                                       | -High NPV >99%<br>-Simple workflow<br>-Cost-effective                                                                                                                                                                                      | -Low PPV<br>-High NPV<br>Intermediate specificity                                                                                                                                                                                                                                                            | -Used in routine screening when BKPyV-DNA loads are not available<br>-Papanicolaou-, Wright-Giemsa-, Sternheimer-Malbin or hematoxylin/eosin staining techniques or phase contrast<br>-Manuel or automated intelligent microscopy used<br>-Decoy cells should not be confused with high-grade urothelial carcinoma<br>-Specificity can be increased by preparation by immunohistochemistry staining for LTag and/or Vp1 | 10-21             |
|                           | PyV-virions / aggregates ("hauffen")<br>Electron microscopy | -Urine                                                                                                                       | -proposed marker for biopsy-proven BKPyV-nephropathy<br>-High PPV for biopsy-proven BKPyV-nephropathy                                                                                                                                      | -Requires processing and routine access to EM technical services<br>- Identifies more advanced disease at risk of limited response to interventions                                                                                                                                                          | -Mainly used by one dedicated center<br>- missing comparison of treatment response rates with current standard of care using plasma BKPyV-DNA loads                                                                                                                                                                                                                                                                     | 22,23             |

| <b>Virological Assays</b> | <b>Target (Method)</b>                                         | <b>Matrix, compartment</b>       | <b>Advantages</b>                                                                                                                                                     | <b>Limitations</b>                                                                                                                          | <b>Additional comments</b>                                                                                                                                                                   | <b>References</b> |
|---------------------------|----------------------------------------------------------------|----------------------------------|-----------------------------------------------------------------------------------------------------------------------------------------------------------------------|---------------------------------------------------------------------------------------------------------------------------------------------|----------------------------------------------------------------------------------------------------------------------------------------------------------------------------------------------|-------------------|
| BKPyV-transcripts         | viral RNA <i>VP1</i> (RT-QNAT)                                 | -Urine<br>-Urinary cell sediment | -Assessment of active BKPyV replication                                                                                                                               | -mRNAs is degradation-sensitive<br>-Pre-analytic processing and cell enrichments, stabilization reagents, prompt<br>-Labor-intensive        | -Further clinical studies are required to evaluate the PPV and NPV diagnosis and managements<br>-Comparison with BKPyV-DNA loads lacking                                                     | 24-26             |
|                           | Viral micro RNAs bkv-miR-B1-3p or bkv-miR-B1-5p (RT-QNAT)      | -Urine, plasma, urine exosomes   | -Higher sensitivity early, lower specificity<br>-In extracellular environments, miRNAs are apparently more stable than <i>VP1</i> mRNAs                               | -Low PPV                                                                                                                                    | -The first two weeks post-KT, urine BKPyV miRNA was detected more frequently than urine BKPyV-DNA<br>-The 3p microRNA is conserved between JCPyV and BKPyV<br>-Controlled studies are needed | 27-29             |
| Genotyping and subtyping  | viral DNA (Multiplex NAT or multiplex QNAT)                    | -Plasma, urine, biopsy           | -Rapid BKPyV-genotyping                                                                                                                                               | -No subtyping of BKPyV-genotypes                                                                                                            | -Assay uses one probe per genotype                                                                                                                                                           | 7,30              |
|                           | Genome sequence, majority and minority variants, mutants (NGS) | -Plasma, urine, biopsy           | -Targeted or complete genome sequencing<br>- BKPyV-genotyping and subtyping<br>-Assessment of NCCR sequence<br>-Assessment of BKPyV integration into the human genome | -Requires access to NGS equipment, technical and bioinformatics resources<br>-Expensive<br>-Slow and not available as point-of-care testing | -Long range and amplicon-based protocols available                                                                                                                                           | 7,31-33           |
|                           | Sanger sequencing/ viral DNA or NAT products                   | -Plasma, urine, biopsy           | -Targeted genome sequencing<br>-BKPyV-genotyping/subtyping<br>-Assessment of NCCR rearrangements                                                                      | -Limited to sequencing of 1000bp regions<br>-Minority variants with frequencies <15% are not detected                                       | -Mainly applied for sequencing of specific genome regions such as the NCCR and VP1-typing regions                                                                                            | 33-37             |

**Supplement Table S3: LABORATORY METHODS - IMMUNOLOGY**

| Immunological Assays                        | Target (Method)                                          | Matrix, compartment | Advantages                                                                                                                                                                                  | Limitations                                                                                                                                                                                                                                                                                                                                                                                  | Additional comments                                                                                                                                                                                                                                                                                                                                             | References     |
|---------------------------------------------|----------------------------------------------------------|---------------------|---------------------------------------------------------------------------------------------------------------------------------------------------------------------------------------------|----------------------------------------------------------------------------------------------------------------------------------------------------------------------------------------------------------------------------------------------------------------------------------------------------------------------------------------------------------------------------------------------|-----------------------------------------------------------------------------------------------------------------------------------------------------------------------------------------------------------------------------------------------------------------------------------------------------------------------------------------------------------------|----------------|
| BKPyV-specific antibody                     | BKPyV IgG or IgM or IgA or IgG/IgM (ELISA <sup>1</sup> ) | - Serum, plasma     | -Rapid<br>-High-throughput<br>-Broad range<br>-Highly reproducible<br>-qualitative<br>-quantitative                                                                                         | -Currently only one commercial assay available<br>-Laboratory-developed assays require antigen production, purification and validation<br>-Recombinant GST-Vp1 fusion proteins (monomeric or pentameric), VLPs<br>-Purification from insect cells, yeast or E.coli<br>-Background reactivity may be variable and need monitoring<br>-Validation is laboratory dependent<br>-No EQA available | - Usually based on VLPs mimicking native virions of the predominant serotype I and sometimes also IV<br>- May be based on GST-Vp1 fusion proteins or mimotopes, <i>i.e.</i> , synthetic peptides<br>- Antibodies binding GST-Vp1 fusion protein or mimotopes may differ from antibodies binding VLPs<br>- VLP based ELISAs seem to have the highest specificity | 7,38-45        |
|                                             | BKPyV IgG (bead-based assay, Luminex)                    | -Serum, plasma      | - Can be multiplexed to measure antibodies to different serotypes or to different polyomaviruses<br>-Semi-quantitative by titration or by normalization to reference serum standards        | -Based on Vp1 fusion proteins with purification tagging (GST, 6xHis, biotinylated<br>-Manual preparation,<br>-Costly equipment needed                                                                                                                                                                                                                                                        | -Available to few research-oriented centers                                                                                                                                                                                                                                                                                                                     | 7,46-49        |
|                                             | Neutralization assay/<br>Neutralizing antibodies         | -Serum, plasma      | - Measurement of functional activity preventing BKPyV<br>-Semi-quantitative by titration<br>entry and gene expression                                                                       |                                                                                                                                                                                                                                                                                                                                                                                              | -Requires cell culturing<br>-Requires preparation of infectious virus or pseudovirions or reporter virus<br>- Available to few research-oriented centers                                                                                                                                                                                                        | 7,50-55        |
|                                             | Hemagglutination Inhibition Assay                        | -Serum, plasma      | -Fast and easy processing<br>-Semi-quantitative by titration                                                                                                                                | -Less sensitive than ELISA                                                                                                                                                                                                                                                                                                                                                                   | -Requires virions, VLPs or pseudovirions<br>-Requires specific blood-type erythrocytes<br>-Serum may contain nonspecific inhibitors                                                                                                                                                                                                                             | 12,19,39,50,56 |
| BKPyV-specific cell-mediated immunity (CMI) | Cytokine secretion (ELISPOT)                             | -PBMCs              | -Functional response to 15mer peptide/epitope stimulation<br>-No prior knowledge on HLA needed<br>-(semi-)quantitative<br>-More sensitive than other CMI assays<br>- simple instrumentation | -Turn-around times of 24h<br>-Technical skills required<br>-No access to polyfunctional T-cells                                                                                                                                                                                                                                                                                              | -Positive responses associated with controlling BKPyV replication<br>-Consensus on cut-off, T-cell activation procedure and cytokine not                                                                                                                                                                                                                        | 57-65          |

|  |                                                               |                                   |                                                                                                                                                                                                                                                                                                                                                                                                                                                                                                                                                                                                                                                                                                               |                                                                                                                                                                                                                                                                                                     |                                                                                                                                                                                                                                        |                |
|--|---------------------------------------------------------------|-----------------------------------|---------------------------------------------------------------------------------------------------------------------------------------------------------------------------------------------------------------------------------------------------------------------------------------------------------------------------------------------------------------------------------------------------------------------------------------------------------------------------------------------------------------------------------------------------------------------------------------------------------------------------------------------------------------------------------------------------------------|-----------------------------------------------------------------------------------------------------------------------------------------------------------------------------------------------------------------------------------------------------------------------------------------------------|----------------------------------------------------------------------------------------------------------------------------------------------------------------------------------------------------------------------------------------|----------------|
|  |                                                               |                                   | <ul style="list-style-type: none"> <li>-Targetable to specific early and/or late viral proteins (LTag, sTag, Vp1, Vp2/3, agnoprotein)</li> <li>-applicable to CD8 T cells using immunodominant 9mer epitopes</li> <li>-targetable to genotype-specific CD8 T cell responses</li> </ul>                                                                                                                                                                                                                                                                                                                                                                                                                        | <ul style="list-style-type: none"> <li>--Mostly IFN<math>\gamma</math> secretion assessed</li> <li>-Moderately expensive</li> </ul>                                                                                                                                                                 | <ul style="list-style-type: none"> <li>established across different studies and centers</li> <li>-Requires further logistic and technical work prior to role in routine clinical practice</li> </ul>                                   |                |
|  | Flow cytometry combined with intracellular cytokine secretion | -PBMCs                            | <ul style="list-style-type: none"> <li>-Functional response to overlapping 15mer peptide epitope pool stimulation</li> <li>-No prior knowledge on HLA needed</li> <li>-(semi-)quantitative</li> <li>-Multiple parameters tested simultaneously</li> <li>-Targetable to specific early and/or late viral proteins (LTag, sTag, Vp1, Vp2/3, agnoprotein)</li> <li>-T cell subsets (CD4 vs CD8)</li> <li>-Naïve, TEMRA, effector vs central memory)</li> <li>-Polyfunctional cytokine secretion (IFN-<math>\gamma</math>, TNF<math>\alpha</math>, IL-2, CD107a)</li> <li>-Applicable to CD8 T cells using immunodominant 9mer epitopes</li> <li>-Targetable to genotype-specific CD8 T cell responses</li> </ul> | <ul style="list-style-type: none"> <li>-Turn-around times 8h - 24h</li> <li>-Technical skills required</li> <li>-very expensive instrumentation</li> <li>-limited sensitivity</li> <li>-Limited sensitivity due to low number of circulating T cells</li> <li>-In vitro expansion needed</li> </ul> | <ul style="list-style-type: none"> <li>-Consensus on cut-off, T-cell activation procedure and cell gating not established across different studies and centers</li> <li>-Not easily applicable to routine clinical practice</li> </ul> | 42,60-64,66-68 |
|  | T-cell responses (MHC-restricted peptide multimers)           | -PBMCs                            | <ul style="list-style-type: none"> <li>-T-cell stimulation not always necessary</li> <li>-Detect MHC-specific T-cells</li> <li>- Targetable to specific early and/or late viral proteins (LTag, sTag, Vp1, Vp2/3, agnoprotein)</li> <li>-targetable to immunodominant CD8 T cell epitopes</li> <li>-targetable to genotype-specific T cell responses</li> </ul>                                                                                                                                                                                                                                                                                                                                               | <ul style="list-style-type: none"> <li>-Technical abilities required</li> <li>-Prior HLA typing required</li> <li>-Very expensive</li> </ul>                                                                                                                                                        | <ul style="list-style-type: none"> <li>-Not easily applicable to routine clinical practice</li> <li>-observed cross-reactivities with JCPyV-specific HLA-peptide complexes</li> </ul>                                                  | 60,66,69-71    |
|  | T lymphocytes activity (ATP levels)                           | - Whole blood sorted CD4+ T-cells |                                                                                                                                                                                                                                                                                                                                                                                                                                                                                                                                                                                                                                                                                                               | <ul style="list-style-type: none"> <li>-Long operating times (&gt;48h)</li> <li>-High constraints on handling/shipping samples,</li> <li>-Technical abilities required</li> <li>-Off-site titration</li> <li>-Expensive</li> </ul>                                                                  | <ul style="list-style-type: none"> <li>-One FDA-cleared assay</li> <li>-Not easily applicable to routine clinical practice</li> </ul>                                                                                                  | 72             |

**Supplement Table S4: LABORATORY METHODS – OTHER ASSAYS**

| Other Assays       | Target (Method)                                                                                                | Matrix, compartment   | Advantages                                                                                                                                                                          | Limitations                                                                                                                                               | Additional comments                                                                                                                                                                                                                                                 | References               |
|--------------------|----------------------------------------------------------------------------------------------------------------|-----------------------|-------------------------------------------------------------------------------------------------------------------------------------------------------------------------------------|-----------------------------------------------------------------------------------------------------------------------------------------------------------|---------------------------------------------------------------------------------------------------------------------------------------------------------------------------------------------------------------------------------------------------------------------|--------------------------|
| Chemokines         | Chemokine levels (bead-based multiplex assays)                                                                 | -Plasma, urine        | - Higher predictive value for BKPyV-nephropathy than serum creatinine reported in a single study                                                                                    | -Not discriminating BKPyV replication vs chronic rejection, such as TCMR                                                                                  | -CXCL-10 concentrations increase in plasma and in urine with increasing burden of BKPyV replication (viral loads)<br>- CXCL-10/creatinine ratio in urine had no predictive value for BKPyV-nephropathy                                                              | 73-78                    |
| Other immune cells | Killer cell-inhibitory receptors (KIR) of Donor and Recipient (Exon sequencing)                                | -PBMCs                | - <i>KIR3DS1</i> /HLA-F interaction<br>-AA telomeric motifs possibly protective against progression to BKPyV-nephropathy                                                            | -Technical abilities required<br>- Time-consuming<br>-Multiplexed PCR possible but expensive                                                              | -Not easily applicable to routine clinical practice<br>-Additional clinical studies are required to evaluate its use for risk stratification in KTRs                                                                                                                | 79-81; for review see 82 |
| HLA-polymorphism   | HLA-typing and polymorphism of Donor and Recipient (Chromosomal DNA, exon sequencing, amplicon NGS sequencing) | -PBMCs                | -Donor <i>HLA-C*07</i> , <i>MICA A5.1</i> and recipient <i>HLA-B51</i> have been suggested to protect against BKPyV-DNAemia                                                         | -Technical abilities required<br>-Time consuming<br>-Not easily applicable to routine clinical practice<br>-Expensive<br>-PPV for BKPyV-DNAemia undefined | -Multiplexed NAT available<br>-Additional clinical studies are required to evaluate its use for risk stratification in KTRs                                                                                                                                         | 46,80,83-86              |
|                    | Torque teno virus (TTV) DNA load (QNAT)                                                                        | -Plasma, serum, urine | -Surrogate marker for post-transplant immunosuppression<br>-High TTV-DNA load in plasma may be predictive marker for infection (3 and more months post-transplant)                  | -PPV of TTV load of 5 log10/mL for plasma BKPyV-DNAemia                                                                                                   | - Studies using high TTV-DNA loads in plasma of KT recipients are controversial as predictive marker for BKPyV-DNAemia/nephropathy                                                                                                                                  | 87-94                    |
|                    | Donor-derived (dd)-cell-free DNA AlloSure; minor allele SNP detection library and 150 bp Illumina X-ten)       | -Urine<br>-Plasma     | -Surrogate marker for kidney injury<br>-Plasma dd-cfDNA-load positively correlates with plasma BKPyV-DNA-loads<br>-No differential between TCMR and biopsy-proven BKPyV-nephropathy | -Broader utility when using commercial assays and instrumentation<br>-NGS equipment, technical and bioinformatics resources<br>-Expensive                 | -Small sample size and study sites<br>-Selected patients<br>-Unspecific marker of donor tissue injury<br>-Additional clinical studies are required to evaluate the PPV for biopsy-proven BKPyV-nephropathy<br>-Expensive<br>-Labor-intensive<br>-Resource-demanding | 95,96                    |

**Supplement Table S5: STUDIES INVESTIGATING REDUCTION OF IMMUNOSUPPRESSION (MYCOPHENOLATE REDUCTION FIRST)**

| Reference                             | Study Design                                                           | Participants (N)                                                                                                                                                                                                                                                                                                                      | Treatment                                                                                                                                                                                                                                                                                                               | Outcome (Follow-up / observation time)                                                                                                                                                                                                                                                                                                                                                                                                                                                                                                                                                                                                                                                                                                                                                                                                                                                     |
|---------------------------------------|------------------------------------------------------------------------|---------------------------------------------------------------------------------------------------------------------------------------------------------------------------------------------------------------------------------------------------------------------------------------------------------------------------------------|-------------------------------------------------------------------------------------------------------------------------------------------------------------------------------------------------------------------------------------------------------------------------------------------------------------------------|--------------------------------------------------------------------------------------------------------------------------------------------------------------------------------------------------------------------------------------------------------------------------------------------------------------------------------------------------------------------------------------------------------------------------------------------------------------------------------------------------------------------------------------------------------------------------------------------------------------------------------------------------------------------------------------------------------------------------------------------------------------------------------------------------------------------------------------------------------------------------------------------|
| Brennan et al., 2005 <sup>97</sup>    | Single-center open-label, prospective, randomized (2 TAC:1 CsA) trial. | <i>de novo</i> KT recipients<br>Induction with 6 mg/kg of anti-thymocyte globulin.<br>FK506 (n = 134)<br>69 (52%) received AZA and 65 (49%) received MMF.<br>CyA (n = 66)<br>43 (65%) received AZA and 23 (35%) received MMF.<br><br>BKPyV-DNAemia and BKPyV-DNAuria were collected weekly for 16 weeks and at months 5, 6, 9 and 12. | Identification of BKPyV-DNAemia (qualitative PCR measurement; quantitative PCR was performed retrospectively) triggered discontinuation of AZA or MMF. If viremia failed to clear within 4 weeks, the calcineurin inhibitor dose was tapered to trough CyA levels of 100–200 ng/mL or trough FK506 levels of 3–5 ng/mL. | 70 patients (35%) developed viruria and 23 (11.5%) BKPyV-DNAemia. No BK nephropathy was observed.<br><br>Reduction of immunosuppression per this protocol was associated with clearance of BKPyV-DNAemia in 22 of 23 patients (95%) by 1 year after transplant.<br><br>In 7 patients, BKPyV-DNAemia cleared after cessation of the adjuvant agent alone, in 2 patients a decrease in the calcineurin dose alone was made. 6 patients required cessation of the adjuvant agent and a decrease in the calcineurin dose.<br><br>Ten cases of acute rejection (5%), 6 (4%) occurred in the TAC group and 4 (6%) in the CsA group. Only one rejection episode was directly related to protocol-directed immunosuppression reduction. Patient survival was 99% in the FK506 group and 100% in the CsA group. Death censored graft survival was 95% in the FK506 group and 100% in the CsA group. |
| Seifert ME et al., 2017 <sup>98</sup> | Retrospective 10-year analysis                                         | Ten-year follow-up.<br><br>N=193                                                                                                                                                                                                                                                                                                      | Discontinuation of AZA or MMF during the first year after kidney transplantation due to BKPyV-DNAemia                                                                                                                                                                                                                   | 10-year outcomes of subjects undergoing immunosuppression reduction for BKPyV-DNAemia compared to patients without BKPyV-DNAemia, respectively.<br>Acute rejection: 14% vs. 15% (p=0.96)<br>Death with a functioning graft: 33% vs. 17% (p=0.02)<br>Death-censored graft loss: 8% vs. 15% (p=0.25)<br>eGFR: 63±22 vs. 60±22 ml/min/1.73 m <sup>2</sup> (p=0.46)                                                                                                                                                                                                                                                                                                                                                                                                                                                                                                                            |



|                                               |                                                                                                                                                                                              |                                                                                                                                                                                                                                                                                                                    |                                                                                                                                                                                                                                                                                                                                                                             |                                                                                                                                                                                                                                                                                                                                                                                              |
|-----------------------------------------------|----------------------------------------------------------------------------------------------------------------------------------------------------------------------------------------------|--------------------------------------------------------------------------------------------------------------------------------------------------------------------------------------------------------------------------------------------------------------------------------------------------------------------|-----------------------------------------------------------------------------------------------------------------------------------------------------------------------------------------------------------------------------------------------------------------------------------------------------------------------------------------------------------------------------|----------------------------------------------------------------------------------------------------------------------------------------------------------------------------------------------------------------------------------------------------------------------------------------------------------------------------------------------------------------------------------------------|
| <p>Kharel A et al., 2021 <sup>99</sup></p>    | <p>Single-center retrospective study (n=224)</p> <p>BKPyV-DNAemia measured every 2 weeks for the first 3 months, monthly from months 3-12, and at the time of a kidney allograft biopsy.</p> | <p>224 with BKPyV-DNAemia &gt; 1000 copies/mL.</p> <p>Induction: Basiliximab (49%)<br/>Anti-thymocyte globulin (35%)<br/>Alemtuzumab (16%)<br/>maintenance immunosuppressive regimen: CNI (mostly tacrolimus), and a mycophenolic acid, with or without prednisone</p>                                             | <p>BKPyV-DNAemia 1000-10 000 copies/mL: the antimetabolite is decreased by 25%.<br/>BKPyV-DNAemia &gt;10 000: the antimetabolite is decreased by 50% followed by decreases in calcineurin inhibitor (CNI) targets, with adjustments occurring no sooner than 2 weeks from prior regimen manipulation.</p>                                                                   | <p>118 (53%) resolved or had persistent low BKPyV-DNAemia<br/>64 (28%) had severe BKPyV-nephropathy<br/>42 (19%) developed dnDSA (n=33) or AR (n=9).</p>                                                                                                                                                                                                                                     |
| <p>Steubl D et al., 2012 <sup>100</sup></p>   | <p>Retrospective multicenter</p>                                                                                                                                                             | <p>Patients with sustained BKPyV-DNAemia &gt; 500 copies/mL on at least two consecutive measurements.</p> <p>CNI, mycophenolate, prednisolone</p> <p>Immunosuppression of the patients had to be reduced in order to treat the BKPyV-DNAemia.</p>                                                                  | <p>Group MMF ex (n = 14): discontinuation of MMF and reduction of the remaining immunosuppression after BKPyV-DNAemia was detected for the first time.<br/>Group IMMUN red (n=32): dosage of immunosuppressive therapy was reduced, but MMF was not discontinued at the time of first BKPyV-DNAemia detection.</p>                                                          | <p>Patients with sustained freedom from BKPyV-DNAemia</p> <p>Group MMF ex (n=13, 93%)<br/>Group IMMUN red (n=19, 60%)</p> <p>Patients in whom MMF was stopped had a higher chance of clearance of BKPyV-DNAemia (p = 0.022), which was achieved more rapidly (p = 0.048).</p>                                                                                                                |
| <p>Devresse A et al., 2019 <sup>101</sup></p> | <p>Single center, retrospective study (n = 111)</p>                                                                                                                                          | <p>57 patients who underwent gradual tapering of IS vs 54 patients who underwent rapid tapering for sustained BKPyV-DNAemia (defined as two consecutive positive tests for BKPyV-DNAemia).<br/>71 patients received rATG induction, 37 received basiliximab. Maintenance IS with tacrolimus, MPA and steroids.</p> | <p>Gradual group: stepwise reduction every month until BKPyV-DNAemia decreased in two consecutive steps of 50% MPA dose reduction before complete withdrawal and then tacrolimus reduction to reach troughs levels of 3-5 ng/ml.<br/>Rapid group: IS reduced as outlined above but changes were made every 2 weeks. No patients received specific anti-viral treatment.</p> | <p>The rapid minimization strategy shortened BKPyV-DNAemia (P &lt; 0.001) and resulted in a better protection of graft function in patients with confirmed BKPyV-nephropathy (P = 0.033) without impacting 5-year graft survival. Survival without rejection was similar (P = 0.571), but the rapid group had increased <i>de novo</i> donor-specific antibodies (dnDSAs; P &lt; 0.001).</p> |

**Supplement Table S6: STUDIES INVESTIGATING REDUCTION OF IMMUNOSUPPRESSION (CALCINEURIN INHIBITOR REDUCTION FIRST)**

| Reference                           | Study Design                                                                                                 | Participants (N)                                                                                                                                                                                                                        | Treatment                                                                                                                                                                                                                                                                                                                                                                                                                                                                                                           | Outcome (Follow-up / observation time)                                                                                                                                                                                                                                                                                                                                                                                                                                                                                                                                                                                                                                                                                                                                                                                                                                       |
|-------------------------------------|--------------------------------------------------------------------------------------------------------------|-----------------------------------------------------------------------------------------------------------------------------------------------------------------------------------------------------------------------------------------|---------------------------------------------------------------------------------------------------------------------------------------------------------------------------------------------------------------------------------------------------------------------------------------------------------------------------------------------------------------------------------------------------------------------------------------------------------------------------------------------------------------------|------------------------------------------------------------------------------------------------------------------------------------------------------------------------------------------------------------------------------------------------------------------------------------------------------------------------------------------------------------------------------------------------------------------------------------------------------------------------------------------------------------------------------------------------------------------------------------------------------------------------------------------------------------------------------------------------------------------------------------------------------------------------------------------------------------------------------------------------------------------------------|
| Bischof et al., 2019 <sup>102</sup> | Retrospective single-center cohort with pre-defined standard operating procedure for screening and treatment | KT recipients (N=644):<br>- 'no decoy cells' N=432 (66%)<br>- 'decoy cells/no BKPyV-DNAemia' N=105 (17%)<br>- BKPyV-DNAemia ( $\geq 300$ cp/mL) N=105, 17%<br>=probable N=24, 4%;<br>=presumptive N=48, 8%;<br>= biopsy-proven N=33, 5% | Immunosuppression reduction, no other interventions<br><br>Patients with BKPyV-DNAemia:<br>-Step 1: Tac trough levels were set one step lower than intended by the protocol and targeted as predefined for the next time-period<br>-Step 2: If BKPyV-DNAemia did not decrease within 4 weeks, Tac trough levels were further reduced by one step as predefined for the next time-period<br>-Step 3: If BKPyV-DNAemia did not decrease within 4 weeks, the dosing of MPA was reduced in steps of 50% or discontinued | - 96% viremic patients cleared BKPyV-DNAemia.<br>-Clearance after tacrolimus reduction alone for 39% of all patients, but response differed according to diagnosis<br>-At 6-years post-transplant, no differences among the three groups regarding graft survival and clinical rejection<br>-Patients (N=24) with probable BKPyV-nephropathy (i.e. $1000 < x < 10,000$ c/mL) cleared BKPyV-DNAemia in 63% by Tac reduction alone; another 25% required MPA reduction<br>-Patients (N=48) with presumptive BKPyV-nephropathy ( $> 10,000$ c/mL, biopsy not done or neg) cleared BKPyV-DNAemia by Tac-reduction alone in 51%; another 48% required MPA reduction<br>-Patients (N=33) with biopsy-proven BKPyV-nephropathy cleared BKPyV-DNAemia by Tac-reduction alone in 21%; another 61% required MPA reduction<br>-Follow-up median 6.6 years post-transplant (min 1.3 yrs) |
| Schaub et al., 2010 <sup>21</sup>   | Retrospective single-center cohort with pre-defined standard operating procedure for treatment               | KT recipients with BKPyV-DNAemia/Nephropathy (N=38)<br>(biopsy-proven, N=13; presumptive, N=17; probable, N=8)                                                                                                                          | Patients with sustained BKPyV-DNAemia $> 1000$ c/mL:<br>Step 1: Tac trough levels were set one step lower as intended by the protocol and targeted as predefined for the next time-period<br>Step 2: If BKPyV-DNAemia did not constantly decrease, Tac trough levels were further reduced by one step as predefined for the next time-period<br>Step 3: If BKPyV-DNAemia did not constantly decrease, the dosing of MMF was reduced by 50% and then discontinued (step 4).                                          | -35/38 (92%) patients cleared BKPyV-DNAemia after tacrolimus reduction alone<br>-Patients (N=8) with probable BKPyV-nephropathy (i.e. $1000 < x < 10,000$ c/mL) cleared BKPyV-DNAemia in 100%; requiring only Tac-reduction (100%)<br>-Patients (N=17) with presumptive BKPyV-nephropathy ( $> 10,000$ c/mL, biopsy not done or neg) cleared BKPyV-DNAemia by Tac-reduction alone in 47%; another 41% required MPA reduction; 11% did not clear<br>Patients (N=13) with biopsy-proven BKPyV-nephropathy cleared BKPyV-DNAemia by Tac-reduction alone in 17%; another 50% required MPA reduction; MPA discontinuation in 33%; 1 (8%) did not clear<br>-Follow-up showed clinical rejection in 3 (8%); subclinical rejection in 7 (18%)<br>-No graft loss<br>-Median follow-up time of 34 months (range 18–60)                                                                 |

|                                          |                                                                                                       |                                                          |                                                                                                                                                                                                                                                                                                                                                                                                                                                                                                                                                                                                                                                                                                   |                                                                                                                                                                                                                                                                      |
|------------------------------------------|-------------------------------------------------------------------------------------------------------|----------------------------------------------------------|---------------------------------------------------------------------------------------------------------------------------------------------------------------------------------------------------------------------------------------------------------------------------------------------------------------------------------------------------------------------------------------------------------------------------------------------------------------------------------------------------------------------------------------------------------------------------------------------------------------------------------------------------------------------------------------------------|----------------------------------------------------------------------------------------------------------------------------------------------------------------------------------------------------------------------------------------------------------------------|
| <p>Ginevri et al., 2007<sup>64</sup></p> | <p>Prospective, single-center, observational, pediatric kidney transplantation cohort</p>             | <p>KT recipients (N=62)<br/>BKPyV-DNAemia N=13 (21%)</p> | <p>Patients with stable baseline renal function,<br/>-Step 1: reduction following the predefined standard operating procedure without further intervention<br/>-Step 2: if BKPyV-DNAemia increased over the 4 next weeks, reduction of calcineurin inhibitor by 15-20%<br/>-Step 3: if BKPyV-DNAemia persisted MMF reduction by 50%<br/>-Step 4: If BKPyV-DNAemia persisted, MMF discontinuation</p> <p>Patients with presumptive BKPyV-nephropathy and decreasing renal function:<br/>-Step 1: reduction of calcineurin inhibitor by 15-20%<br/>-Step 2: if BKPyV-DNAemia increased over the 4 next weeks, MMF reduction by 50%<br/>-Step 3: If BKPyV-DNAemia persisted, MMF discontinuation</p> | <p>BKPyV-DNAemia clearance:<br/>- protocol reduction +/- calcineurin inhibitor reduction in 10/13 patients<br/>- 100% after a median of 2 months (range 1-8 months)<br/>-No biopsy-proven BKPyV-nephropathy diagnosed after a<br/>-Median follow-up of 24 months</p> |
| <p>Sood et al., 2012<sup>103</sup></p>   | <p>Retrospective single-center cohort with pre-defined standard operating procedure for treatment</p> | <p>KT recipients (N=65) with BKPyV-DNAemia</p>           | <p>- Step 1: 25% of simultaneous reduction in MMF and Tac dosing without any antiviral therapy.<br/>-Step 2: an additional 25% reduction in dosing of both MMF and Tac at 1 month if the decline in BKPyV-DNAemia level was less than 25% from peak levels<br/>-Tacrolimus target in the significant BKPyV-DNAemia group: 4 to 6 ng/mL.</p>                                                                                                                                                                                                                                                                                                                                                       | <p>-The mean plasma BKPyV-DNA declined by 98% (range, 76%–100%)<br/>-Acute cellular rejection seen in four (14%) of 28 patients<br/>-No decline in estimated glomerular filtration rate<br/>-Follow-up 1 year after peak BKPyV-DNAemia</p>                           |

Note: All adult patients unless indicated otherwise

**Supplement Table S7: STUDIES INVESTIGATING SWITCHING TO mTOR INHIBITOR FOR TREATMENT OF BKPyV-DNAEMIA/NEPHROPATHY**

| Reference                                 | Study type                                                         | Study population                                                                                                                                                                 | Treatment (Intervention versus Comparator)                                                                                                                                                                  | Endpoint (follow-up / observation time)                                                     | Result                                                                                                                                                                                                                          | Acute Rejection after treatment (%)                                                       | Graft loss (%)         |
|-------------------------------------------|--------------------------------------------------------------------|----------------------------------------------------------------------------------------------------------------------------------------------------------------------------------|-------------------------------------------------------------------------------------------------------------------------------------------------------------------------------------------------------------|---------------------------------------------------------------------------------------------|---------------------------------------------------------------------------------------------------------------------------------------------------------------------------------------------------------------------------------|-------------------------------------------------------------------------------------------|------------------------|
| Wojciechowski et al., 2017 <sup>104</sup> | Prospective, randomized, open-label, Single-center pilot           | KT recipients on Tac/MMF/pred (N=40) with BKPyV-DNAuria $\geq 6$ log <sub>10</sub> c/mL or BKPyV-DNAemia                                                                         | Switch MMF to everolimus (N=20) versus MMF dose reduction by 50% (N=20) (Note: Tac trough levels were lowered in both groups from $8.4 \pm 2.3$ ng/mL at enrolment to $5.3 \pm 2.1$ ng/mL during follow-up) | BKPyV-DNAemia clearance or 50% reduction in BKPyV-DNAuria at 3 months (follow-up 12 months) | Primary endpoint 11 (55%) Vs. 8 (40%) ( $P=0.53$ ) BKPyV-DNAemia clearance 8/15 (50%) vs. 5/15 (33%) $P=0.47$ AE: Hypercholesterolemia at month 3 in everolimus group month 3 (212 % 56.8 mg/dL vs 170 % 29.8 mg/dL; $P=0.01$ ) | 1/20 vs. 1/20 eGFR at 12 months $58.9 \pm 21.5$ vs. $65.1 \pm 20.7$ )                     | 0/20 vs. 0/20          |
| Bussalino et al., 2021 <sup>105</sup>     | Non-randomized, single-center, consecutive vs. historical controls | KT recipients on CNI/MMF/Pred (N=20) with consecutive diagnosis of biopsy-proven BKPyV-nephropathy (N=10) (CsA 4; Tac 6) compared with historical controls (N=10) (CsA 4; Tac 6) | Switch MMF to Everolimus + reduced CNI (N=10) versus reduced CNI + reduced MMF (N=10)                                                                                                                       | Graft function; BKPyV-DNAemia (follow-up 36 months)                                         | eGFR 25 ml/min higher in cases ( $p=0.002$ ); BKPyV-DNAemia loads decrease $>2$ log <sub>10</sub> ( $p=0.001$ ) in cases, 1.6 log <sub>10</sub> lower than in controls ( $p=0.06$ )                                             | 1/10 vs. 3/10; also <i>de novo</i> DSA 1/10 vs. 1/10                                      | 0/10 vs. 5/10 $P=0.03$ |
| Polanco et al., 2015 <sup>106</sup>       | Case series                                                        | KT recipients (N=15) with biopsy-proven BKPyV-nephropathy                                                                                                                        | MMF stop and switch Tac to everolimus + pred (N=9) (Group 1)<br><br>Group 2: continued (N=6)                                                                                                                | BKPyV-DNAemia, eGFR, graft loss (follow-up min 36 months; mean 58m, range 39-73)            | BKPyV-DNAemia -clearance in 6 (66%) -95% reduced in 3 (33%) $<1500$ c/mL in 100%                                                                                                                                                | At dx: AR in 4 (incl. 2 cases with biopsy-proven BKPyV-nephropathy (2 PyVAN-A; 2 PyVAN-B) | 0/9 vs. 2/6            |

|                              |             |                                                                                                                                                                               |                                                                                                                                                                                                            |                                                                          |                                                                                                                                      |                               |                         |
|------------------------------|-------------|-------------------------------------------------------------------------------------------------------------------------------------------------------------------------------|------------------------------------------------------------------------------------------------------------------------------------------------------------------------------------------------------------|--------------------------------------------------------------------------|--------------------------------------------------------------------------------------------------------------------------------------|-------------------------------|-------------------------|
| Belliere et al., 2016<br>107 | Case series | ABOi KT recipients (N=7) on Tac/MPA with BKPyV-DNAemia including, 5 with plasma BKPyV load <10,000 c/mL and 2 with biopsy-proven BKPyV-nephropathy. at 1-18 m post-transplant | Switch Tac - MPA to reduced Tac - everolimus (N=7) versus reduced MPA (N=14): note: only 1/14 with BKPyV-DNAemia); (Note: Tac trough levels significantly lower in EVL group; median 4.9 ng/mL vs 6 ng/mL) | Observational, eGFR, BKPyV-DNAemia (follow-up mean 26m, range 13m – 29m) | No significant difference in eGFR (54.5, 0-128) vs. 40, 14-56) <i>P</i> =0.07; BKPyV-DNAemia decrease in 5/7 (71%) AE: dyslipidemia) | 0 (note: C4d-staining in 5/7) | 0/7 Vs 1/14 after ABMR; |
|------------------------------|-------------|-------------------------------------------------------------------------------------------------------------------------------------------------------------------------------|------------------------------------------------------------------------------------------------------------------------------------------------------------------------------------------------------------|--------------------------------------------------------------------------|--------------------------------------------------------------------------------------------------------------------------------------|-------------------------------|-------------------------|

Note: All adult patients unless indicated otherwise

**Supplement Table S8: STUDIES INVESTIGATING USE OF INTRAVENOUS IMMUNOGLOBULIN (IVIG)**

| Reference                           | Study design         | Participants (N) | Dose of intervention                 | Graft function                                                  | Graft loss (%) | Viral clearance (%) | Rejection (%) |
|-------------------------------------|----------------------|------------------|--------------------------------------|-----------------------------------------------------------------|----------------|---------------------|---------------|
| Sener et al., 2006 <sup>108</sup>   | Case series          | n = 8            | 2.0 g/kg over 2-5 days               | Cr at:<br>Diagnosis:<br>293±32<br>Last follow up:<br>309±46     | 12             | 50                  | 0             |
| Anyagbu et al., 2012 <sup>109</sup> | Case series          | n = 4            | 2 mg/kg over 12-24 hours             | eGFR at:<br>Last follow up:<br>113                              | 0              | 100                 | 25            |
| Vu et al., 2015 <sup>110</sup>      | Case series          | n = 30           | 1.0 g/kg                             | Median eGFR at:<br>Diagnosis:<br>46<br>Last follow up:<br>63    | 3              | 90                  | -             |
| Kable et al., 2017 <sup>111</sup>   | Retrospective Cohort | n = 22 IVIG      | 100 mg/kg per dose (Total: 10 doses) | Cr at:<br>Diagnosis:<br>164±52<br>At 3-mo follow up:<br>199±102 | 27             | 77                  | 64            |
|                                     |                      | n = 28 (no IVIG) | N/A                                  | Cr at:<br>Diagnosis:<br>184±54<br>At 3-mo follow up:<br>235±108 | 54             | 33                  | 57            |

**Supplement Table S9: STUDIES INVESTIGATING USE OF CIDOFOVIR**

| Reference                               | Study Design         | Participants                                                                                                                                                                     | Treatment                                                                                                                                                                                                  | Outcome (follow-up)<br>(Treatment vs. controls)                                                                                                                                                                                                                                                                                                                                                                                                                                                                                                                                                                                                                                                                                                                                                                                             |
|-----------------------------------------|----------------------|----------------------------------------------------------------------------------------------------------------------------------------------------------------------------------|------------------------------------------------------------------------------------------------------------------------------------------------------------------------------------------------------------|---------------------------------------------------------------------------------------------------------------------------------------------------------------------------------------------------------------------------------------------------------------------------------------------------------------------------------------------------------------------------------------------------------------------------------------------------------------------------------------------------------------------------------------------------------------------------------------------------------------------------------------------------------------------------------------------------------------------------------------------------------------------------------------------------------------------------------------------|
| Kuypers et al., 2005 <sup>112</sup>     | Retrospective cohort | KT recipients (N=21) with biopsy-proven BKPyV-nephropathy                                                                                                                        | Immunosuppression minimization + cidofovir (n=8)<br><i>versus</i><br>Immunosuppression minimization alone (n=13)                                                                                           | BKPyV-DNAemia clearance not different at 12 months (p=0.41)<br>No graft loss in cidofovir group vs 69% graft loss in no cidofovir group (p=0.004)<br>(note: patients with worse renal function at time of diagnosis did not receive cidofovir)                                                                                                                                                                                                                                                                                                                                                                                                                                                                                                                                                                                              |
| Scantlebury et al., 2002 <sup>113</sup> | Case series          | KT recipients (N=16) with biopsy-proven BKPyV-nephropathy (15 adult/ 1 pediatric)                                                                                                | Immunosuppression minimization + cidofovir                                                                                                                                                                 | BKPyV-DNAemia cleared in 14 (88%) patients after mean 3.5 months; graft loss in 4 (25%) patients.                                                                                                                                                                                                                                                                                                                                                                                                                                                                                                                                                                                                                                                                                                                                           |
| Burgos et al., 2006 <sup>114</sup>      | Case series          | KT recipients (N=20) with biopsy-proven BKPyV-nephropathy<br>n = 13 transplanted February 1998 to July 2003 (Group A)<br>n = 7 transplanted July 2003 to February 2005 (Group B) | Immunosuppression minimization (n=20)<br>+ cidofovir (n = 13)                                                                                                                                              | BKPyV-DNAemia cleared in 9 (69%) that received immunosuppression minimization plus cidofovir<br>No difference in serum creatinine at 1 year of follow-up for those treated with cidofovir<br>Graft loss occurred in 3 (23%) of Group A and 3 (43%) of Group B patients                                                                                                                                                                                                                                                                                                                                                                                                                                                                                                                                                                      |
| Wadei et al., 2006 <sup>115</sup>       | Case series          | KT recipients (N=55) with biopsy-proven BKPyV-nephropathy                                                                                                                        | Immunosuppression minimization+ cidofovir (n=20)<br>Immunosuppression minimization + IVIG (n=2)<br>Immunosuppression minimization + cidofovir + IVIG (n=10)<br>Immunosuppression minimization alone (n=23) | No association between cidofovir use and viral clearance or graft outcome, but serial measurement of BKPyV-DNAemia was not available on a sufficient number of patients. Relationship between prognostic factors and risk for any functional decline and failure of viral clearance on follow-up biopsy 3 to 6 months post diagnosis of BKPyV-nephropathy:<br>Odds ratio of failure of viral clearance (n = 45):<br>low dose cidofovir: 1.50 (0.44-5.23), p = 0.52<br>IVIG: 0.40 (0.08-1.72), p = 0.24<br>Conversion to cyclosporine: 1.99 (0.57-7.38), p = 0.29<br><br>Hazard ration for any functional decline (n = 55)<br>Cidofovir: 1.24 (0.52-3.00)<br>IVIG: 0.84 (0.24-2.26)<br>Conversion to cyclosporine:1.03 (0.42-2.65)<br>Post diagnosis: follow-up for the entire cohort was 19.7±11 months and 8 (15%) patients had graft loss |
| Kuten et al., 2014 <sup>116</sup>       | Case series          | KT recipients (N=75) with presumptive BKPyV-nephropathy (BKPyV-DNAemia >10,000 c/mL)                                                                                             | Immunosuppression minimization + cidofovir                                                                                                                                                                 | BKPyV-DNAemia cleared in 53 (71%) patients<br>-Failure to reduce BKPyV-DNAemia by 1 log <sub>10</sub> c/mL after 1 month of cidofovir treatment increased risk for incomplete response to treatment.<br>-Grade 3 or 4 bone marrow suppression was reported in the study.<br>-Subgroup analysis of 18 patients treated with cidofovir compared to 15 patients treated with reduced immunosuppression alone failed to show a difference in clearance of BKPyV-DNAemia<br>Graft loss attributable to BKPyV-nephropathy occurred in 2 (3%) patients and graft loss overall occurred in 12 (16%) patients including 2 (3%) deaths                                                                                                                                                                                                                |

Note: All adult patients unless indicated otherwise

**Supplement Table S10: STUDIES INVESTIGATING USE OF LEFLUNOMIDE**

| Reference                                         | Study Design                                                                                                           | Participants (N)                                                                                                               | Treatment                                                                                                                                                                                            | Outcome (follow-up)<br>(Treatment vs. controls)                                                                                                                                                                                                                                                                                                                                                                                                                                                                                                                                                                                                                                                                                                                                                                                                                                                                                                                                                                                                            |
|---------------------------------------------------|------------------------------------------------------------------------------------------------------------------------|--------------------------------------------------------------------------------------------------------------------------------|------------------------------------------------------------------------------------------------------------------------------------------------------------------------------------------------------|------------------------------------------------------------------------------------------------------------------------------------------------------------------------------------------------------------------------------------------------------------------------------------------------------------------------------------------------------------------------------------------------------------------------------------------------------------------------------------------------------------------------------------------------------------------------------------------------------------------------------------------------------------------------------------------------------------------------------------------------------------------------------------------------------------------------------------------------------------------------------------------------------------------------------------------------------------------------------------------------------------------------------------------------------------|
| Josephson et al., 2006 <sup>117</sup>             | Prospective, multicenter, case series                                                                                  | KT recipients (N=18)<br>KPT recipients (N=7)<br>and heart-KPT (N=1)<br>(total N=26)<br>with biopsy-proven<br>BKPyV-nephropathy | Immunosuppression minimization +<br>Leflunomide (n=17) or Leflunomide<br>+ Cidofovir (n=9)                                                                                                           | BKPyV-DNAemia cleared in 22 (85%)<br>patients; graft loss in 4 of 26 (15%).<br>Patients with improving renal function had<br>leflunomide dosed to obtain a targeted<br>blood level of active metabolite, A771726,<br>of 50 µg/ml to 100 µg/ml<br>1 (4%) patient had increasing alkaline<br>phosphatase to 5 times above baseline,<br>requiring dose reduction.                                                                                                                                                                                                                                                                                                                                                                                                                                                                                                                                                                                                                                                                                             |
| Faguer et al., 2007 <sup>118</sup>                | Prospective, single<br>center, case<br>series                                                                          | KT recipients (N=12)<br>with biopsy-proven<br>BKPyV-nephropathy                                                                | Immunosuppression minimization+<br>MMF switched to Leflunomide                                                                                                                                       | BKPyV-DNAemia cleared in 5 (42%), serum<br>creatinine concentration stabilized or<br>improved in 8 (66%), dosed to targeted<br>blood level of active metabolite A771726 of<br>40-80 µg/mL, dose limiting anemia adverse<br>effects seen in 2 (17%). Graft loss occurred<br>in 2 (17%) patients.                                                                                                                                                                                                                                                                                                                                                                                                                                                                                                                                                                                                                                                                                                                                                            |
| Leca et al.,<br>2008 <sup>119</sup>               | Retrospective,<br>single center,<br>cohort,                                                                            | KT recipients (N=21)<br>with biopsy-proven<br>BKPyV-nephropathy                                                                | Immunosuppression minimization+<br>MMF switched to Leflunomide,<br>patients stratified according to<br>Leflunomide concentration (low level<br><40 µg/ml (n = 12) vs high-level >40<br>µg/ml) (n =9) | No difference in BKPyV-DNAemia<br>clearance between both strata; 6 (50%) low-<br>level group vs 5 (56%) high level group],<br>hemolysis and thrombotic microangiopathy<br>possibly associated with higher drug levels<br>3 (25%) graft losses in low-level (<40 µg/ml<br>leflunomide concentration) and 1 (11%) in<br>high-level group (>40 µg/ml leflunomide<br>concentration)<br>(no adverse events directly related to BK<br>patients)                                                                                                                                                                                                                                                                                                                                                                                                                                                                                                                                                                                                                  |
| Teschner et al., 2009 <sup>120</sup>              | Prospective,<br>multicenter, case<br>series, with pre-<br>defined standard<br>operating<br>procedure for<br>treatment  | KT recipients (N=13)<br>with biopsy-proven<br>BKPyV-nephropathy                                                                | Immunosuppression minimization+<br>MMF switched to Leflunomide                                                                                                                                       | BKPyV-DNAemia cleared in 12 (92%)<br>patients; with stabilization of serum<br>creatinine. Drug levels monitored in 8<br>(62%), dosed to targeted blood level of<br>active metabolite A77126 of 40 µg /mL,<br>but no correlation with treatment response;<br>1 (8%) experienced adverse effects (pain<br>and paresthesia)<br>1 (8%) patient had graft loss.                                                                                                                                                                                                                                                                                                                                                                                                                                                                                                                                                                                                                                                                                                 |
| Krisl et al.,<br>2012 <sup>121</sup>              | Retrospective,<br>single<br>center, cohort,<br>with pre-defined<br>standard<br>operating<br>procedure for<br>treatment | KT recipients (N=76)<br>with BKPyV-DNAemia<br>or biopsy-proven<br>BKPyV-nephropathy                                            | Immunosuppression minimization<br>(not uniform)<br>Leflunomide use (n = 52),<br>32 (62%) also had BKPyV<br>nephropathy<br><br>No leflunomide use (n = 24), 1(4%)<br>also had BKPyV nephropathy       | BKPyV-DNAemia cleared in 14 (29%) of<br>those who had A771726 monitoring (n = 48<br>of 52 receiving leflunomide)<br>BKPyV-DNAemia clearance associated with<br>MMF discontinuation.<br>Mean A771726 concentrations were 45±27<br>mg/ml and 47±19 mg/ml (P=0.75) in<br>patients who did and did not achieve<br>BKPyV-DNAemia clearance.<br>There were similar rates of BKPyV-<br>DNAemia clearance in patients with<br>A771726 concentrations of > 40 mg/ml vs <<br>40 mg/ml<br>12 (23%) had at least one pre-specified<br>adverse event, with thrombocytopenia being<br>the most common, occurring in 15%<br>patients experiencing adverse events.<br>Graft loss occurred in 15% of patients in the<br>leflunomide group and 7% of patients in the<br>group who did not receive it. When<br>evaluating patients with BKPyV-DNAemia<br>but not biopsy-proven BKPyV-nephropathy,<br>death or graft loss occurred in 15 of 20<br>(75%) of patients treated with leflunomide<br>compared to 9 of 23 (39%) patients who<br>were not treated with it, (p = 0.65) |
| Cuellar-<br>Rodriguez et al., 2013 <sup>122</sup> | Retrospective,<br>single center case<br>series, with pre-                                                              | KT and KPT recipients<br>(N=22) with BKPyV-<br>DNAemia                                                                         | Immunosuppression minimization +<br>Leflunomide ± other antiviral                                                                                                                                    | BKPyV-DNAemia cleared in 17 (77%) on<br>leflunomide while 4 (18%) never cleared,<br>and 1 (5%) early discontinued leflunomide                                                                                                                                                                                                                                                                                                                                                                                                                                                                                                                                                                                                                                                                                                                                                                                                                                                                                                                              |



|                                        |                                                                                                       |                                                                                                                                                                                                                                                                                                      |                                                                     |                                                                                                                                                                                                                                                                                                                                                                                                                                                                                             |
|----------------------------------------|-------------------------------------------------------------------------------------------------------|------------------------------------------------------------------------------------------------------------------------------------------------------------------------------------------------------------------------------------------------------------------------------------------------------|---------------------------------------------------------------------|---------------------------------------------------------------------------------------------------------------------------------------------------------------------------------------------------------------------------------------------------------------------------------------------------------------------------------------------------------------------------------------------------------------------------------------------------------------------------------------------|
|                                        | defined standard operating procedure for treatment                                                    | (number of KT vs KPT was not defined)                                                                                                                                                                                                                                                                | therapies (n = 11 cidofovir, n = 7 IVIG)                            | and cleared on cidofovir, viral loads decline steadily ("smooth") or fluctuating ("zigzag") patterns<br>Leflunomide adjusted per levels of teriflunomide metabolite, with a goal of 50,000–80,000 ng/mL<br>Adverse reactions possibly associated with leflunomide occurred in 15 (68%) patients, with cytopenia being most common 10 (67%)<br>Graft loss occurred in 10(45%) of patients, but of those graft losses, only 2 of 10 (20%) occurred during the era of BKPyV-DNAemia screening. |
| Nesselhauf et al., 2016 <sup>123</sup> | Retrospective, single center case series, with pre-defined standard operating procedure for treatment | KT recipients (N=26) and KPT recipients (N=2) with BKPyV-DNAemia or biopsy-proven BKPyV-nephropathy: BKPyV-DNAemia and concomitant biopsy biopsy-proven acute rejection 14 (50%), BKPyV-nephropathy 5 (18%), BKPyV-DNAemia and donor specific antibodies 2 (7%), and persistent BKPyV-DNAemia (25%). | Immunosuppression reduction of MMF 50% dose + Leflunomide           | BKPyV-DNAemia cleared in 20 (71%) patients, only 15 (54%) patients achieved therapeutic drug levels; in those who achieved therapeutic levels (50-100 mcg/mL) 9 (60%) required high Leflunomide doses (≥60mg/day)<br>11 (39%) patients experienced possible adverse events related to leflunomide, with leukopenia being most commonly reported 10 (91%)<br>Graft loss occurred in 6 (21%) patients and death occurred in 2 (7%) patients                                                   |
| Keller et al., 2019 <sup>124</sup>     | Retrospective, observational, multicenter study                                                       | KT recipients (N=55) with biopsy-proven BKPyV-nephropathy                                                                                                                                                                                                                                            | Immunosuppression minimization as per center protocol + Leflunomide | BKPyV-DNAemia cleared in 42 (76%), rejection in 18 (33%), graft loss in 11 (20%). Only 11 (20%) patients (20%) underwent leflunomide drug monitoring.<br>No significant associations were observed between adverse events and trough levels<br>Adverse events occurred in 10 (18%) patients with hematologic toxicity being most commonly reported in 6 cases.                                                                                                                              |

- KT, kidney transplant; KPT, kidney pancreas transplant
- BKPyV, BK polyomavirus
- CsA, cyclosporine A
- JCPyV, JC polyomavirus
- MMF, mycophenolate mofetil
- MPA, mycophenolic acid
- PyVAN-A, -B, -C, polyomavirus-associated nephropathy stage-A, -B, -C,
- TAC, tacrolimus
- Note: All adult patients unless indicated otherwise

**Supplement Table S11: STUDIES INVESTIGATING USE OF FLUOROQUINOLONES**

| Reference                                 | Study Design                                                                  | Participants                                                     | Treatment                                                                                                                    | Outcome (follow-up)<br>(Treatment vs. controls)                                                                                                                                                                                                                                                                                                                                                                                               |
|-------------------------------------------|-------------------------------------------------------------------------------|------------------------------------------------------------------|------------------------------------------------------------------------------------------------------------------------------|-----------------------------------------------------------------------------------------------------------------------------------------------------------------------------------------------------------------------------------------------------------------------------------------------------------------------------------------------------------------------------------------------------------------------------------------------|
| Gabardi et al., 2010 <sup>125</sup>       | Retrospective, single center, cohort study                                    | KT (n =185) who had at least one BKV blood QNAT sample performed | Ciprofloxacin 250 mg (twice daily) or Levofloxacin (250 mg (daily) (n = 25) Control group (n = 160)                          | BKPyV-DNAemia at 12 months: 1 (4%) vs. 36 (22.5%) (p<0.03)<br>Of patients with diagnosed BKPyV-DNAemia: Continued BKPyV-DNAemia after therapeutic interventions occurred in: 0 of 1 (0%) vs 20 of 40 (50%) patients (p = ns)<br>Overall biopsy-proven BKPyV-nephropathy: 1 of 1 (100%) vs 14 of 40 (35%) (p = < 0.0001)<br>Graft loss secondary to biopsy-proven BKPyV-nephropathy occurred in 0 of 1 (0%) compared to 4 of 40 (10%), (p= ns) |
| Wojciechowski et al., 2012 <sup>126</sup> | Retrospective, single center, historical control cohort study                 | 130 vs. 106                                                      | Ciprofloxacin 250 mg (twice daily) prophylaxis immediately after transplant (n = 130) or none (historical control) (n = 106) | BKPyV-DNAemia (3 months) 6,5% vs. 16,1% (p<0.01)<br>BKPyV-DNAemia at 12 months: 22% vs 25% (p=0.4058); biopsy-proven BKPyV-nephropathy at 12 months: 1 (0,8%) vs.5 (4.7%), (p=0.057).<br>Graft loss outcomes: not reported                                                                                                                                                                                                                    |
| Knoll et al., 2014 <sup>127</sup>         | Prospective, multicenter, randomized double-blind placebo-controlled trial    | 76 vs. 78                                                        | Levofloxacin 500 mg (daily) prophylaxis within 5 days of transplant (n = 76) vs placebo (n =78)                              | BKPyV-DNAemia (within 12 m) 22 (29.0%) vs. 26 (33.3%) (RR 0.87; 95% CI 0.54-1.39)<br>BKPyV-DNAemia (within 12 months) 6 (7.9%) vs. 9 (11.5%) (RR 0.68;95% CI 0.26-1.76)<br>BKPyV-nephropathy: none<br>Graft loss: 0 (0%) vs 1 (1.3%)                                                                                                                                                                                                          |
| Patel et al., 2019 <sup>128</sup>         | Prospective, single center, randomized, double-blind placebo-controlled trial | 133 vs. 67                                                       | Ciprofloxacin 500 mg (daily) (n = 133) prophylaxis vs. placebo (n = 67)                                                      | BKPyV-DNAemia (6 months) 25 (18.8%) vs. 5 (7.5%) (p=0.03)<br>BKPyV-DNAemia (12 months) 31 (23.3%) vs.8 (11.9%; p=0.06)<br>biopsy-proven BKPyV-nephropathy (12 months) 7 (5.8) vs.1 (1.5%) (p=0.26)<br>13 patients with BKPyV-DNAemia excluded in whom biopsy was not performed.<br>Graft loss at 12 months: 2 (1.5%) vs 2 (3.0%; p=0.48)                                                                                                      |

**Supplement Table S12: STUDIES INVESTIGATING USE OF STATINS**

| Reference                           | Study Design              | Participants | Treatment                                                                                                                                                                  | Outcome (follow-up)<br>(Treatment vs. controls)                                                                                                                                                        |
|-------------------------------------|---------------------------|--------------|----------------------------------------------------------------------------------------------------------------------------------------------------------------------------|--------------------------------------------------------------------------------------------------------------------------------------------------------------------------------------------------------|
| Gabardi et al., 2015 <sup>129</sup> | Retrospective, two-center | 32 vs. 36    | Statin vs none before BKPyV-DNAemia diagnosis (>500 c/mL on 2 consecutive tests within 1 year of transplant) vs no statin exposure before or after BKPyV-DNAemia diagnosis | Biopsy-proven BKPyV-nephropathy incidence (12 months) 28.1% vs. 41.7% (p = 0.312). Mean follow-up time was 1428.0 ± 727.4 days in statin group and 1411.0 ± 680.7 days in no statin group (p = 0.921). |
|                                     |                           |              |                                                                                                                                                                            |                                                                                                                                                                                                        |

## REFERENCES

1. Leung AY, Chan M, Tang SC, Liang R, Kwong YL. Real-time quantitative analysis of polyoma BK viremia and viruria in renal allograft recipients. *J Virol Methods*. 2002;103(1): 51-56.
2. Solis M, Meddeb M, Sueur C, et al. Sequence Variation in Amplification Target Genes and Standards Influences Interlaboratory Comparison of BK Virus DNA Load Measurement. *J Clin Microbiol*. 2015;53(12): 3842-3852.
3. Govind S, Hockley J, Morris C, Almond N. The development and establishment of the 1st WHO BKV International Standard for nucleic acid based techniques. *Biologicals*. 2019;60: 75-84.
4. Agrawal N, Echenique IA, Meehan SM, et al. Variability in assessing for BK viremia: whole blood is not reliable and plasma is not above reproach - a retrospective analysis. *Transpl Int*. 2017;30(7): 670-678.
5. Leuzinger K, Naegele K, Schaub S, Hirsch HH. Quantification of plasma BK polyomavirus loads is affected by sequence variability, amplicon length, and non-encapsidated viral DNA genome fragments. *J Clin Virol*. 2019;121: 104210.

6. Kamminga S, Sidorov IA, Tadesse M, et al. Translating genomic exploration of the family Polyomaviridae into confident human polyomavirus detection. *iScience*. 2022;25(1): 103613.
7. Leuzinger K, Hirsch HH. Human Polyomaviruses. *Manual of Clinical Microbiology*. 2023;2: 2093-2130.
8. Bateman AC, Greninger AL, Atienza EE, Limaye AP, Jerome KR, Cook L. Quantification of BK Virus Standards by Quantitative Real-Time PCR and Droplet Digital PCR Is Confounded by Multiple Virus Populations in the WHO BKV International Standard. *Clin Chem*. 2017;63(3): 761-769.
9. Xu D, Jiang S, He Y, Jin X, Zhao G, Wang B. Development of a therapeutic vaccine targeting Merkel cell polyomavirus capsid protein VP1 against Merkel cell carcinoma. *NPJ Vaccines*. 2021;6(1): 119.
10. Coleman DV, Gardner SD, Field AM. Human polyomavirus infection in renal allograft recipients. *Br Med J*. 1973;3(5876): 371-375.
11. Sekito T, Araki M, Yoshinaga K, et al. Presence of decoy cells for 6 months on urine cytology efficiently predicts BK virus nephropathy in renal transplant recipients. *Int J Urol*. 2021;28(12): 1240-1246.
12. Hisadome Y, Noguchi H, Nakafusa Y, et al. Association of Pretransplant BK Polyomavirus Antibody Status with BK Polyomavirus Infection After Kidney Transplantation: A Prospective Cohort Pilot Study of 47 Transplant Recipients. *Transplant Proc*. 2020;52(6): 1762-1768.
13. Yan L, Guo H, Han L, et al. Sternheimer-Malbin Staining to Detect Decoy Cells in Urine of 213 Kidney Transplant Patients. *Transplant Proc*. 2020;52(3): 823-828.
14. Huang Y, Chen XT, Yang SC, et al. Detection of Proximal Tubule Involvement by BK Polyomavirus in Kidney Transplant Recipients With Urinary Sediment Double-Immunostaining. *Front Immunol*. 2020;11: 582678.

15. Chen XT, Chen WF, Hou XT, et al. Non-invasive urinary sediment double-immunostaining predicts BK polyomavirus associated-nephropathy in kidney transplant recipients. *Ann Transl Med.* 2020;8(5): 235.
16. Khosravi M, Dadras M, Monfared A, et al. Investigating Risk Factors for the Development of BK Virus Infection in Kidney Transplant Recipients in Guilan Province during 2007-2015. *Urol J.* 2020;17(6): 620-625.
17. Galed-Placed I, Valbuena-Ruvira L. Decoy cells and malignant cells coexisting in the urine from a transplant recipient with BK virus nephropathy and bladder adenocarcinoma. *Diagn Cytopathol.* 2011;39(12): 933-937.
18. D'Alessandro M, Poli L, Lai Q, et al. Automated Intelligent Microscopy for the Recognition of Decoy Cells in Urine Samples of Kidney Transplant Patients. *Transplant Proc.* 2019;51(1): 157-159.
19. Hirsch HH, Knowles W, Dickenmann M, et al. Prospective study of polyomavirus type BK replication and nephropathy in renal-transplant recipients. *N Engl J Med.* 2002;347(7): 488-496.
20. Drachenberg CB, Hirsch HH, Papadimitriou JC, et al. Polyomavirus BK versus JC replication and nephropathy in renal transplant recipients: a prospective evaluation. *Transplantation.* 2007;84(3): 323-330.
21. Schaub S, Hirsch HH, Dickenmann M, et al. Reducing immunosuppression preserves allograft function in presumptive and definitive polyomavirus-associated nephropathy. *Am J Transplant.* 2010;10(12): 2615-2623.
22. Singh HK, Andreoni KA, Madden V, et al. Presence of urinary Haufen accurately predicts polyomavirus nephropathy. *J Am Soc Nephrol.* 2009;20(2): 416-427.
23. Nickeleit V, Davis VG, Thompson B, Singh HK. The Urinary Polyomavirus-Haufen Test: A Highly Predictive Non-Invasive Biomarker to Distinguish "Presumptive" from "Definitive" Polyomavirus Nephropathy: How to Use It-When to Use It-How Does It Compare to PCR Based Assays? *Viruses.* 2021;13(1).

24. Ding R, Medeiros M, Dadhania D, et al. Noninvasive diagnosis of BK virus nephritis by measurement of messenger RNA for BK virus VP1 in urine. *Transplantation*. 2002;74(7): 987-994.
25. Dadhania D, Snopkowski C, Ding R, et al. Epidemiology of BK virus in renal allograft recipients: independent risk factors for BK virus replication. *Transplantation*. 2008;86(4): 521-528.
26. Kumar J, Contrepois K, Snyder M, et al. Design and Methods of the Validating Injury to the Renal Transplant Using Urinary Signatures (VIRTUUS) Study in Children. *Transplant Direct*. 2021;7(12): e791.
27. Kim GJ, Lee JH, Lee DH. Clinical and prognostic significance of Merkel cell polyomavirus in nonsmall cell lung cancer. *Medicine (Baltimore)*. 2017;96(3): e5413.
28. Demey B, Descamps V, Presne C, et al. BK Polyomavirus Micro-RNAs: Time Course and Clinical Relevance in Kidney Transplant Recipients. *Viruses*. 2021;13(2).
29. Li JY, McNicholas K, Yong TY, et al. BK virus encoded microRNAs are present in blood of renal transplant recipients with BK viral nephropathy. *Am J Transplant*. 2014;14(5): 1183-1190.
30. Gard L, Niesters HG, Riezebos-Brilman A. A real time genotyping PCR assay for polyomavirus BK. *J Virol Methods*. 2015;221: 51-56.
31. Sahoo MK, Tan SK, Chen SF, et al. Limited Variation in BK Virus T-Cell Epitopes Revealed by Next-Generation Sequencing. *J Clin Microbiol*. 2015;53(10): 3226-3233.
32. Liimatainen H, Weseslindtner L, Strassl R, Aberle SW, Bond G, Auvinen E. Next-generation sequencing shows marked rearrangements of BK polyomavirus that favor but are not required for polyomavirus-associated nephropathy. *J Clin Virol*. 2020;122: 104215.
33. Müller DC, Rämö M, Naegele K, et al. Donor-derived, metastatic urothelial cancer after kidney transplantation associated with a potentially oncogenic BK polyomavirus. *J Pathol*. 2018;244(3): 265-270.

34. Olsen GH, Andresen PA, Hilmarsen HT, et al. Genetic variability in BK Virus regulatory regions in urine and kidney biopsies from renal-transplant patients. *J Med Virol.* 2006;78(3): 384-393.
35. Jin L. Rapid genomic typing of BK virus directly from clinical specimens. *Mol Cell Probes.* 1993;7(4): 331-334.
36. Luo C, Bueno M, Kant J, Martinson J, Randhawa P. Genotyping schemes for polyomavirus BK, using gene-specific phylogenetic trees and single nucleotide polymorphism analysis. *J Virol.* 2009;83(5): 2285-2297.
37. Gosert R, Rinaldo CH, Funk GA, et al. Polyomavirus BK with rearranged noncoding control region emerge in vivo in renal transplant patients and increase viral replication and cytopathology. *J Exp Med.* 2008;205(4): 841-852.
38. Burguiere AM, Fortier B, Bricout F, Huraux JM. Control of BK virus antibodies in contacts of patients under chronic hemodialysis or after renal transplantation (by an enzyme linked immunosorbent assay). *Pathol Biol (Paris).* 1980;28(8): 541-544.
39. Bodaghi S, Comoli P, Bösch R, et al. Antibody responses to recombinant polyomavirus BK large T and VP1 proteins in young kidney transplant patients. *J Clin Microbiol.* 2009;47(8): 2577-2585.
40. Randhawa PS, Gupta G, Vats A, Shapiro R, Viscidi RP. Immunoglobulin G, A, and M responses to BK virus in renal transplantation. *Clin Vaccine Immunol.* 2006;13(9): 1057-1063.
41. Kardas P, Leboeuf C, Hirsch HH. Optimizing JC and BK polyomavirus IgG testing for seroepidemiology and patient counseling. *J Clin Virol.* 2015;71: 28-33.
42. Schmidt T, Adam C, Hirsch HH, et al. BK polyomavirus-specific cellular immune responses are age-dependent and strongly correlate with phases of virus replication. *Am J Transplant.* 2014;14(6): 1334-1345.
43. Pietrobon S, Bononi I, Mazzoni E, et al. Specific IgG Antibodies React to Mimotopes of BK Polyomavirus, a Small DNA Tumor Virus, in Healthy Adult Sera. *Front Immunol.* 2017;8: 236.

44. François C, Tinez C, Brochet E, et al. Impact of pre-graft serology on risk of BKPyV infection post-renal transplantation. *Nephrol Dial Transplant*. 2022;37(4): 781-788.
45. Hejtmánková A, Roubalová K, Forejtová A, et al. Prevalence of antibodies against BKPyV subtype I and IV in kidney transplant recipients and in the general Czech population. *J Med Virol*. 2019;91(5): 856-864.
46. Wunderink HF, De Brouwer CS, Gard L, et al. Source and Relevance of the BK Polyomavirus Genotype for Infection After Kidney Transplantation. *Open Forum Infect Dis*. 2019;6(3): ofz078.
47. Wunderink HF, de Brouwer CS, van der Meijden E, et al. Development and evaluation of a BK polyomavirus serotyping assay using Luminex technology. *J Clin Virol*. 2019;110: 22-28.
48. Kamminga S, van der Meijden E, Wunderink HF, Touzé A, Zaaijer HL, Feltkamp MCW. Development and Evaluation of a Broad Bead-Based Multiplex Immunoassay To Measure IgG Seroreactivity against Human Polyomaviruses. *J Clin Microbiol*. 2018;56(4).
49. Wunderink HF, van der Meijden E, van der Blij-de Brouwer CS, et al. Pretransplantation Donor-Recipient Pair Seroreactivity Against BK Polyomavirus Predicts Viremia and Nephropathy After Kidney Transplantation. *Am J Transplant*. 2017;17(1): 161-172.
50. Lorentzen EM, Henriksen S, Kaur A, et al. Early fulminant BK polyomavirus-associated nephropathy in two kidney transplant patients with low neutralizing antibody titers receiving allografts from the same donor. *Virol J*. 2020;17(1): 5.
51. Solis M, Velay A, Porcher R, et al. Neutralizing Antibody-Mediated Response and Risk of BK Virus-Associated Nephropathy. *J Am Soc Nephrol*. 2018;29(1): 326-334.
52. Abend JR, Changala M, Sathe A, et al. Correlation of BK Virus Neutralizing Serostatus With the Incidence of BK Viremia in Kidney Transplant Recipients. *Transplantation*. 2017;101(6): 1495-1505.
53. Pastrana DV, Brennan DC, Cuburu N, et al. Neutralization serotyping of BK polyomavirus infection in kidney transplant recipients. *PLoS Pathog*. 2012;8(4): e1002650.



54. Flaegstad T, Traavik T, Christie KE, Joergensen J. Neutralization test for BK virus: plaque reduction detected by immunoperoxidase staining. *J Med Virol.* 1986;19(3): 287-296.
55. Shah KV, Daniel RW, Warszawski RM. High prevalence of antibodies to BK virus, an SV40-related papovavirus, in residents of Maryland. *J Infect Dis.* 1973;128(6): 784-787.
56. Gardner SD, Field AM, Coleman DV, Hulme B. New human papovavirus (B.K.) isolated from urine after renal transplantation. *Lancet.* 1971;1(7712): 1253-1257.
57. Lepore M, Crespo E, Melilli E, et al. Functional immune monitoring of BK Virus and donor-specific T-cell effector immune responses to guide treatment decision-making after kidney transplantation; an illustrative case report and literature review. *Transpl Infect Dis.* 2021;23(2): e13495.
58. Bae H, Na DH, Chang JY, et al. Usefulness of BK virus-specific interferon- $\gamma$  enzyme-linked immunospot assay for predicting the outcome of BK virus infection in kidney transplant recipients. *Korean J Intern Med.* 2021;36(1): 164-174.
59. Udomkarnjananun S, Kerr SJ, Francke MI, et al. A systematic review and meta-analysis of enzyme-linked immunosorbent spot (ELISPOT) assay for BK polyomavirus immune response monitoring after kidney transplantation. *J Clin Virol.* 2021;140: 104848.
60. Leboeuf C, Wilk S, Achermann R, et al. BK Polyomavirus-Specific 9mer CD8 T Cell Responses Correlate With Clearance of BK Viremia in Kidney Transplant Recipients: First Report From the Swiss Transplant Cohort Study. *Am J Transplant.* 2017;17(10): 2591-2600.
61. Leuzinger K, Kaur A, Wilhelm M, et al. Molecular Characterization of BK Polyomavirus Replication in Allogeneic Hematopoietic Cell Transplantation Patients. *J Infect Dis.* 2023;227(7): 888-900.
62. Leuzinger K, Kaur A, Wilhelm M, Hirsch HH. Variations in BK Polyomavirus Immunodominant Large Tumor Antigen-Specific 9mer CD8 T-Cell Epitopes Predict Altered HLA-Presentation and Immune Failure. *Viruses.* 2020;12(12).

63. Binggeli S, Egli A, Schaub S, et al. Polyomavirus BK-specific cellular immune response to VP1 and large T-antigen in kidney transplant recipients. *Am J Transplant.* 2007;7(5): 1131-1139.
64. Ginevri F, Azzi A, Hirsch HH, et al. Prospective monitoring of polyomavirus BK replication and impact of pre-emptive intervention in pediatric kidney recipients. *Am J Transplant.* 2007;7(12): 2727-2735.
65. Leuenberger D, Andresen PA, Gosert R, et al. Human polyomavirus type 1 (BK virus) agnoprotein is abundantly expressed but immunologically ignored. *Clin Vaccine Immunol.* 2007;14(8): 959-968.
66. van Aalderen MC, Remmerswaal EB, Heutinck KM, et al. Clinically Relevant Reactivation of Polyomavirus BK (BKPyV) in HLA-A02-Positive Renal Transplant Recipients Is Associated with Impaired Effector-Memory Differentiation of BKPyV-Specific CD8+ T Cells. *PLoS Pathog.* 2016;12(10): e1005903.
67. Ahlenstiel-Grunow T, Pape L. Immunosuppression, BK polyomavirus infections, and BK polyomavirus-specific T cells after pediatric kidney transplantation. *Pediatr Nephrol.* 2020;35(4): 625-631.
68. Schachtner T, Müller K, Stein M, et al. BK virus-specific immunity kinetics: a predictor of recovery from polyomavirus BK-associated nephropathy. *Am J Transplant.* 2011;11(11): 2443-2452.
69. Krymskaya L, Sharma MC, Martinez J, et al. Cross-reactivity of T lymphocytes recognizing a human cytotoxic T-lymphocyte epitope within BK and JC virus VP1 polypeptides. *J Virol.* 2005;79(17): 11170-11178.
70. Chen Y, Trofe J, Gordon J, Autissier P, Woodle ES, Koralnik IJ. BKV and JCV large T antigen-specific CD8+ T cell response in HLA A\*0201+ kidney transplant recipients with polyomavirus nephropathy and patients with progressive multifocal leukoencephalopathy. *J Clin Virol.* 2008;42(2): 198-202.

71. Cioni M, Leboeuf C, Comoli P, Ginevri F, Hirsch HH. Characterization of Immunodominant BK Polyomavirus 9mer Epitope T Cell Responses. *Am J Transplant.* 2016;16(4): 1193-1206.
72. Sottong PR, Rosebrock JA, Britz JA, Kramer TR. Measurement of T-lymphocyte responses in whole-blood cultures using newly synthesized DNA and ATP. *Clin Diagn Lab Immunol.* 2000;7(2): 307-311.
73. Hu H, Aizenstein BD, Puchalski A, Burmania JA, Hamawy MM, Knechtle SJ. Elevation of CXCR3-binding chemokines in urine indicates acute renal-allograft dysfunction. *Am J Transplant.* 2004;4(3): 432-437.
74. Jackson JA, Kim EJ, Begley B, et al. Urinary chemokines CXCL9 and CXCL10 are noninvasive markers of renal allograft rejection and BK viral infection. *Am J Transplant.* 2011;11(10): 2228-2234.
75. Kariminik A, Yaghoobi R, Dabiri S. Association of BK Virus Infection with CXCL11 Gene Expression and Protein Levels in Kidney Transplant Patients. *Exp Clin Transplant.* 2018;16(1): 50-54.
76. Weseslindtner L, Hedman L, Wang Y, et al. Longitudinal assessment of the CXCL10 blood and urine concentration in kidney transplant recipients with BK polyomavirus replication-a retrospective study. *Transpl Int.* 2020;33(5): 555-566.
77. Haller J, Diebold M, Leuzinger K, et al. Urine CXCL10 to Assess BK Polyomavirus Replication After Kidney Transplantation. *Transplantation.* 2023.
78. Mayer KA, Omic H, Weseslindtner L, et al. Levels of donor-derived cell-free DNA and chemokines in BK polyomavirus-associated nephropathy. *Clin Transplant.* 2022;36(11): e14785.
79. Koyro TF, Kraus E, Lunemann S, et al. Upregulation of HLA-F expression by BK polyomavirus infection induces immune recognition by KIR3DS1-positive natural killer cells. *Kidney Int.* 2021;99(5): 1140-1148.

80. Kovacevic Vojtusek I, Burek Kamenaric M, Ivkovic V, et al. Combined association of recipient killer cell immunoglobulin-like haplotype AA and donor HLA-C\*07 gene with BK virus associated nephropathy in kidney transplant patients. *Hla*. 2019;94 Suppl 2: 4-10.
81. Trydzenskaya H, Juerchott K, Lachmann N, et al. The genetic predisposition of natural killer cell to BK virus-associated nephropathy in renal transplant patients. *Kidney Int*. 2013;84(2): 359-365.
82. Burek Kamenaric M, Ivkovic V, Kovacevic Vojtusek I, Zunec R. The Role of HLA and KIR Immunogenetics in BK Virus Infection after Kidney Transplantation. *Viruses*. 2020;12(12).
83. Tonnerre P, Gérard N, Gavlovsky PJ, et al. MICA Mutant A5.1 Influences BK Polyomavirus Reactivation and Associated Nephropathy After Kidney Transplantation. *J Infect Dis*. 2016;214(5): 807-816.
84. Gheith O, Al-Otaibi T, Zakaria Z, Abdel Halim M, Nampoory N. Human leukocyte antigen Cw7-mediated protection against polyoma BK virus in renal transplant recipients who received grafts from antigen-positive donors. *Exp Clin Transplant*. 2015;13 Suppl 1: 383-387.
85. Bohl DL, Storch GA, Ryschkewitsch C, et al. Donor origin of BK virus in renal transplantation and role of HLA C7 in susceptibility to sustained BK viremia. *Am J Transplant*. 2005;5(9): 2213-2221.
86. Wilhelm M, Wilk S, Kaur A, Hirsch HH. Can HLA-B51 Protect Against BKPyV-DNAemia? *Transplantation*. 2019;103(11): e384-e385.
87. Fernández-Ruiz M, Albert E, Giménez E, et al. Monitoring of alphatorquevirus DNA levels for the prediction of immunosuppression-related complications after kidney transplantation. *Am J Transplant*. 2019;19(4): 1139-1149.
88. Herrmann A, Sandmann L, Adams O, et al. Role of BK polyomavirus (BKV) and Torque teno virus (TTV) in liver transplant recipients with renal impairment. *J Med Microbiol*. 2018;67(10): 1496-1508.

89. Solis M, Velay A, Gantner P, et al. Torquetenovirus viremia for early prediction of graft rejection after kidney transplantation. *J Infect.* 2019;79(1): 56-60.
90. van Rijn AL, Wunderink HF, Sidorov IA, et al. Torque teno virus loads after kidney transplantation predict allograft rejection but not viral infection. *J Clin Virol.* 2021;140: 104871.
91. Handala L, Descamps V, Morel V, et al. No correlation between Torque Teno virus viral load and BK virus replication after kidney transplantation. *J Clin Virol.* 2019;116: 4-6.
92. Doberer K, Schiemann M, Strassl R, et al. Torque teno virus for risk stratification of graft rejection and infection in kidney transplant recipients-A prospective observational trial. *Am J Transplant.* 2020;20(8): 2081-2090.
93. Fernández-Ruiz M, Albert E, Giménez E, et al. Early kinetics of Torque Teno virus DNA load and BK polyomavirus viremia after kidney transplantation. *Transpl Infect Dis.* 2020;22(2): e13240.
94. Strassl R, Schiemann M, Doberer K, et al. Quantification of Torque Teno Virus Viremia as a Prospective Biomarker for Infectious Disease in Kidney Allograft Recipients. *J Infect Dis.* 2018;218(8): 1191-1199.
95. Kant S, Bromberg J, Haas M, Brennan D. Donor-derived Cell-free DNA and the Prediction of BK Virus-associated Nephropathy. *Transplant Direct.* 2020;6(11): e622.
96. Chen XT, Chen WF, Li J, et al. Urine Donor-Derived Cell-Free DNA Helps Discriminate BK Polyomavirus-Associated Nephropathy in Kidney Transplant Recipients With BK Polyomavirus Infection. *Front Immunol.* 2020;11: 1763.
97. Brennan DC, Agha I, Bohl DL, et al. Incidence of BK with tacrolimus versus cyclosporine and impact of preemptive immunosuppression reduction. *Am J Transplant.* 2005;5(3): 582-594.
98. Seifert ME, Gunasekaran M, Horwedel TA, et al. Polyomavirus Reactivation and Immune Responses to Kidney-Specific Self-Antigens in Transplantation. *J Am Soc Nephrol.* 2017;28(4): 1314-1325.

99. Kharel A, Djamali A, Jorgenson MR, et al. Risk factors for progression from low level BK dnaemia to unfavorable outcomes after BK management via immunosuppressive reduction. *Transpl Infect Dis.* 2021;23(3): e13561.
100. Steubl D, Baumann M, Schuster T, et al. Risk factors and interventional strategies for BK polyomavirus infection after renal transplantation. *Scand J Urol Nephrol.* 2012;46(6): 466-474.
101. Devresse A, Tinel C, Vermorel A, et al. No clinical benefit of rapid versus gradual tapering of immunosuppression to treat sustained BK virus viremia after kidney transplantation: a single-center experience. *Transpl Int.* 2019;32(5): 481-492.
102. Bischof N, Hirsch HH, Wehmeier C, et al. Reducing calcineurin inhibitor first for treating BK polyomavirus replication after kidney transplantation: long-term outcomes. *Nephrol Dial Transplant.* 2019;34(7): 1240-1250.
103. Sood P, Senanayake S, Sujeet K, et al. Management and outcome of BK viremia in renal transplant recipients: a prospective single-center study. *Transplantation.* 2012;94(8): 814-821.
104. Wojciechowski D, Chandran S, Webber A, Hirose R, Vincenti F. Mycophenolate Mofetil Withdrawal With Conversion to Everolimus to Treat BK Virus Infection in Kidney Transplant Recipients. *Transplant Proc.* 2017;49(8): 1773-1778.
105. Bussalino E, Marsano L, Parodi A, et al. Everolimus for BKV nephropathy in kidney transplant recipients: a prospective, controlled study. *J Nephrol.* 2021;34(2): 531-538.
106. Polanco N, Gonzalez Monte E, Folgueira MD, et al. Everolimus-based immunosuppression therapy for BK virus nephropathy. *Transplant Proc.* 2015;47(1): 57-61.
107. Belliere J, Kamar N, Mengelle C, et al. Pilot conversion trial from mycophenolic acid to everolimus in ABO-incompatible kidney-transplant recipients with BK viruria and/or viremia. *Transpl Int.* 2016;29(3): 315-322.
108. Sener A, House AA, Jevnikar AM, et al. Intravenous immunoglobulin as a treatment for BK virus associated nephropathy: one-year follow-up of renal allograft recipients. *Transplantation.* 2006;81(1): 117-120.

109. Anyaegbu EI, Almond PS, Milligan T, Allen WR, Gharaybeh S, Al-Akash SI. Intravenous immunoglobulin therapy in the treatment of BK viremia and nephropathy in pediatric renal transplant recipients. *Pediatr Transplant*. 2012;16(1): E19-24.
110. Vu D, Shah T, Ansari J, Naraghi R, Min D. Efficacy of intravenous immunoglobulin in the treatment of persistent BK viremia and BK virus nephropathy in renal transplant recipients. *Transplant Proc*. 2015;47(2): 394-398.
111. Kable K, Davies CD, O'Connell P J, Chapman JR, Nankivell BJ. Clearance of BK Virus Nephropathy by Combination Antiviral Therapy With Intravenous Immunoglobulin. *Transplant Direct*. 2017;3(4): e142.
112. Kuypers DR, Vandooren AK, Lerut E, et al. Adjuvant low-dose cidofovir therapy for BK polyomavirus interstitial nephritis in renal transplant recipients. *Am J Transplant*. 2005;5(8): 1997-2004.
113. Scantlebury V, Shapiro R, P. R, Weck K, Vats A. Cidofovir: A Method of Treatment for BK Virus-Associated Transplant Nephropathy. *Graft*. 2002;5: 82-87.
114. Burgos D, López V, Cabello M, et al. Polyomavirus BK nephropathy: the effect of an early diagnosis on renal function or graft loss. *Transplant Proc*. 2006;38(8): 2409-2411.
115. Wadei HM, Rule AD, Lewin M, et al. Kidney transplant function and histological clearance of virus following diagnosis of polyomavirus-associated nephropathy (PVAN). *Am J Transplant*. 2006;6(5 Pt 1): 1025-1032.
116. Kuten SA, Patel SJ, Knight RJ, Gaber LW, DeVos JM, Gaber AO. Observations on the use of cidofovir for BK virus infection in renal transplantation. *Transpl Infect Dis*. 2014;16(6): 975-983.
117. Josephson MA, Gillen D, Javaid B, et al. Treatment of renal allograft polyoma BK virus infection with leflunomide. *Transplantation*. 2006;81(5): 704-710.
118. Faguer S, Hirsch HH, Kamar N, et al. Leflunomide treatment for polyomavirus BK-associated nephropathy after kidney transplantation. *Transpl Int*. 2007;20(11): 962-969.

119. Leca N, Muczynski KA, Jefferson JA, et al. Higher levels of leflunomide are associated with hemolysis and are not superior to lower levels for BK virus clearance in renal transplant patients. *Clin J Am Soc Nephrol*. 2008;3(3): 829-835.
120. Teschner S, Gerke P, Geyer M, et al. Leflunomide therapy for polyomavirus-induced allograft nephropathy: efficient BK virus elimination without increased risk of rejection. *Transplant Proc*. 2009;41(6): 2533-2538.
121. Krisl JC, Taber DJ, Pilch N, et al. Leflunomide efficacy and pharmacodynamics for the treatment of BK viral infection. *Clin J Am Soc Nephrol*. 2012;7(6): 1003-1009.
122. Cuellar-Rodriguez J, Stephany B, Poggio E, et al. Contrasting patterns of viral load response in transplant recipients with BK polyomavirus DNAemia on leflunomide therapy. *Clin Transplant*. 2013;27(3): E230-236.
123. Nesselhauf N, Strutt J, Bastani B. Evaluation of leflunomide for the treatment of BK viremia and biopsy proven BK nephropathy; a single center experience. *J Nephropathol*. 2016;5(1): 34-37.
124. Keller N, Duquennoy S, Conrad A, et al. Clinical utility of leflunomide for BK polyomavirus associated nephropathy in kidney transplant recipients: A multicenter retrospective study. *Transpl Infect Dis*. 2019;21(2): e13058.
125. Gabardi S, Waikar SS, Martin S, et al. Evaluation of fluoroquinolones for the prevention of BK viremia after renal transplantation. *Clin J Am Soc Nephrol*. 2010;5(7): 1298-1304.
126. Wojciechowski D, Chanda R, Chandran S, et al. Ciprofloxacin prophylaxis in kidney transplant recipients reduces BK virus infection at 3 months but not at 1 year. *Transplantation*. 2012;94(11): 1117-1123.
127. Knoll GA, Humar A, Fergusson D, et al. Levofloxacin for BK virus prophylaxis following kidney transplantation: a randomized clinical trial. *Jama*. 2014;312(20): 2106-2114.



128. Patel SJ, Knight RJ, Kuten SA, et al. Ciprofloxacin for BK viremia prophylaxis in kidney transplant recipients: Results of a prospective, double-blind, randomized, placebo-controlled trial. *Am J Transplant*. 2019;19(6): 1831-1837.

129. Gabardi S, Ramasamy S, Kim M, et al. Impact of HMG-CoA reductase inhibitors on the incidence of polyomavirus-associated nephropathy in renal transplant recipients with human BK polyomavirus viremia. *Transpl Infect Dis*. 2015;17(4): 536-543.
